# Supplementary material for: The Flynn Effect of Multidimensional Health and The Impact of Long-term Care Insurance Scheme for Chinese Middle-and-Old Age Adults
Source: Research Square preprint supplement (doi:10.21203/rs.3.rs-6964068/v1), 2025-08-21
Supplement: Supplementary file 1 [file a4d671dba031c54165464007.docx]

**Appendix**

**Appendix 1. Characteristics of respondents aged 45–85 years in CAHRLS from 2011 to 2020**

|  | Compare group 1  (76-84 years old) | | | | Compare group 2  (66-74 years old) | | | | Compare group 3  (56-64 years old) | | | | | Compare group 4  (46-54 years old) | | | | |
| --- | --- | --- | --- | --- | --- | --- | --- | --- | --- | --- | --- | --- | --- | --- | --- | --- | --- | --- |
|  | T=0 | | T=1 | | T=0 | | T=1 | | T=0 | | T=1 | | | T=0 | | | T=1 | |
|  | Mean | Std | Mean | Std | Mean | Std | Mean | Std | Mean | Std | Mean | Std | Mean | | Std | Mean | | Std |
| Self-rated health | 2.801 | 1.019 | 2.862 | 1.004 | 2.815 | 0.947 | 2.902 | 1.002 | 2.938 | 0.969 | 3.082 | 1.016 | 3.099 | | 0.968 | 3.255 | | 1.028 |
| Chronic disease | 1.589 | 1.486 | 1.010 | 1.295 | 1.607 | 1.460 | 0.950 | 1.248 | 1.369 | 1.401 | 0.773 | 1.103 | 1.025 | | 1.239 | 0.614 | | 0.967 |
| Disability | 0.306 | 0.461 | 0.205 | 0.403 | 0.212 | 0.408 | 0.160 | 0.367 | 0.146 | 0.353 | 0.106 | 0.308 | 0.098 | | 0.298 | 0.086 | | 0.281 |
| ADL limitation | 1.090 | 1.682 | 1.030 | 1.632 | 0.737 | 1.357 | 0.649 | 1.276 | 0.511 | 1.120 | 0.401 | 0.989 | 0.310 | | 0.859 | 0.214 | | 0.720 |
| Physical activity | 0.313 | 0.464 | 0.397 | 0.489 | 0.537 | 0.499 | 0.597 | 0.490 | 0.656 | 0.475 | 0.696 | 0.460 | 0.729 | | 0.444 | 0.754 | | 0.431 |
| Social activity | 0.569 | 0.495 | 0.461 | 0.500 | 0.521 | 0.500 | 0.482 | 0.500 | 0.539 | 0.498 | 0.538 | 0.499 | 0.619 | | 0.486 | 0.613 | | 0.487 |
| Internet | 0.005 | 0.071 | 0.045 | 0.208 | 0.014 | 0.116 | 0.111 | 0.314 | 0.028 | 0.166 | 0.267 | 0.442 | 0.076 | | 0.266 | 0.423 | | 0.494 |
| Sleep quality | 0.597 | 0.491 | 0.619 | 0.486 | 0.633 | 0.482 | 0.629 | 0.483 | 0.651 | 0.477 | 0.617 | 0.486 | 0.675 | | 0.468 | 0.662 | | 0.473 |
| Sibling | 3.097 | 2.096 | 3.415 | 2.018 | 3.535 | 2.038 | 3.841 | 2.020 | 3.958 | 1.996 | 4.185 | 1.876 | 4.081 | | 1.788 | 3.876 | | 1.807 |
| Early-life health | 3.287 | 1.076 | 3.225 | 1.117 | 3.221 | 1.092 | 3.240 | 1.117 | 3.206 | 1.099 | 3.324 | 1.084 | 3.315 | | 1.048 | 3.443 | | 1.079 |
| Early-life hunger | 0.598 | 0.490 | 0.627 | 0.484 | 0.718 | 0.450 | 0.844 | 0.363 | 0.833 | 0.373 | 0.686 | 0.464 | 0.583 | | 0.493 | 0.497 | | 0.500 |
| Early-life economic | 2.493 | 1.044 | 2.464 | 0.994 | 2.459 | 0.978 | 2.413 | 0.987 | 2.409 | 0.983 | 2.492 | 0.965 | 2.514 | | 0.956 | 2.515 | | 0.968 |
| Early-life environment | 2.660 | 0.818 | 2.709 | 0.803 | 2.710 | 0.781 | 2.694 | 0.783 | 2.668 | 0.798 | 2.660 | 0.790 | 2.675 | | 0.785 | 2.662 | | 0.785 |
| Medical resource  accessibility | 0.763 | 0.425 | 0.825 | 0.380 | 0.842 | 0.365 | 0.888 | 0.315 | 0.896 | 0.304 | 0.926 | 0.261 | 0.933 | | 0.249 | 0.938 | | 0.241 |
| Medical insurance | 0.922 | 0.268 | 0.943 | 0.232 | 0.954 | 0.209 | 0.963 | 0.188 | 0.954 | 0.210 | 0.970 | 0.171 | 0.949 | | 0.221 | 0.963 | | 0.188 |
| Frequent IPT experience  in early-life | 0.003 | 0.053 | 0.005 | 0.069 | 0.006 | 0.075 | 0.006 | 0.075 | 0.008 | 0.090 | 0.012 | 0.110 | 0.014 | | 0.119 | 0.020 | | 0.137 |
| Age | 80.526 | 2.427 | 78.548 | 2.245 | 70.878 | 2.365 | 68.631 | 2.271 | 60.959 | 2.349 | 58.882 | 2.428 | 50.876 | | 2.362 | 49.578 | | 2.340 |
| Gender | 9.475 | 0.499 | 0.496 | 0.500 | 0.506 | 0.500 | 0.496 | 0.500 | 0.484 | 0.500 | 0.491 | 0.500 | 0.469 | | 0.499 | 0.448 | | 0.497 |
| Education | 1.156 | 0.486 | 1.264 | 0.602 | 1.300 | 0.619 | 1.263 | 0.565 | 1.351 | 0.632 | 1.658 | 0.779 | 1.731 | | 0.771 | 1.542 | | 0.707 |
| Marriage | 0.630 | 0.483 | 0.608 | 0.488 | 0.797 | 0.403 | 0.815 | 0.388 | 0.890 | 0.313 | 0.915 | 0.279 | 0.928 | | 0.258 | 0.951 | | 0.215 |
| Sample size | 2,933 | | 5,316 | | 7,374 | | 12,284 | | 15,187 | | 13,563 | | | 14,723 | | | 10,887 | |

Note: Standard deviation in parentheses, and *p < 0.1, **p < 0.05, ***p < 0.01.

Abbreviations: Std, Standard deviation.

**Appendix 2-1. Oaxaca-Blinder decomposition results for self-rated health**

|  | **Self-rated health** | | | | | |
| --- | --- | --- | --- | --- | --- | --- |
|  | **Compare group 1 (76-84 years old)** | | | **Compare group 2 (66-74 years old)** | | |
|  | Endowments | P-value | Contribution  (%) | Endowments | P-value | Contribution  (%) |
| Physical activity | -0.022 | 0.003 | -43.70 | -0.015 | 0.000 | -77.84 |
| Social activity | 0.004 | 0.218 | 8.84 | 0.000 | 0.564 | -2.14 |
| Internet | 0.000 | 0.951 | -0.64 | -0.006 | 0.261 | -28.85 |
| Sleep quality | -0.025 | 0.049 | -49.17 | 0.001 | 0.858 | 5.84 |
| Sibling | 0.003 | 0.547 | 5.64 | 0.001 | 0.576 | 4.99 |
| Early-life health | 0.004 | 0.276 | 7.46 | -0.002 | 0.234 | -10.07 |
| Early-life hunger | 0.001 | 0.820 | 1.47 | -0.001 | 0.870 | -3.22 |
| Early-life economic | 0.008 | 0.119 | 16.22 | 0.002 | 0.184 | 11.57 |
| Early-life environment | -0.003 | 0.417 | -6.52 | 0.003 | 0.192 | 15.99 |
| Medical resource  accessibility | 0.000 | 0.933 | -0.91 | -0.005 | 0.061 | -27.54 |
| Medical insurance | 0.000 | 0.947 | -0.04 | 0.001 | 0.507 | 3.26 |
| Frequent IPT experience in early-life | 0.000 | 0.898 | -0.20 | 0.001 | 0.367 | 3.47 |
| Age | 0.046 | 0.050 | 92.25 | -0.033 | 0.031 | -168.74 |
| Gender | -0.002 | 0.452 | -4.36 | 0.001 | 0.558 | 3.03 |
| Education | 0.001 | 0.819 | 1.85 | 0.000 | 0.704 | 1.36 |
| Marriage | -0.001 | 0.825 | -1.61 | 0.001 | 0.357 | 4.32 |
| Region (reference group Eastern) |  |  |  |  |  |  |
| Northern | -0.004 | 0.257 | -7.79 | 0.005 | 0.013 | 27.77 |
| Northeastern | -0.001 | 0.611 | -1.54 | 0.000 | 0.723 | 1.42 |
| Northwestern | 0.010 | 0.036 | 19.18 | -0.003 | 0.158 | -16.00 |
| Southern | 0.001 | 0.527 | 2.36 | 0.000 | 0.996 | 0.01 |
| Southwestern | 0.005 | 0.245 | 9.67 | -0.010 | 0.003 | -51.91 |
| Central | 0.001 | 0.736 | 2.02 | 0.002 | 0.353 | 9.41 |
| Hukou (reference group agricultural) |  |  |  |  |  |  |
| Non-agricultural | 0.003 | 0.316 | 6.00 | 0.007 | 0.010 | 34.65 |
| Unified resident | -0.003 | 0.598 | -5.76 | -0.003 | 0.197 | -17.55 |
| None | 0.001 | 0.306 | 1.95 | 0.000 | 0.436 | 1.82 |
| Total | 0.026 | 0.407 | 52.67 | -0.054 | 0.006 | -274.93 |
|  |  |  |  |  |  |  |
|  | **Compare group 3 (56-64 years old)** | | | **Compare group 4 (46-54 years old)** | | |
|  | Endowments | P-value | Contribution  (%) | Endowments | P-value | Contribution  (%) |
| Physical activity | -0.004 | 0.018 | 33.29 | -0.002 | 0.446 | -20.53 |
| Social activity | 0.000 | 0.609 | 2.09 | 0.003 | 0.157 | 33.04 |
| Internet | -0.018 | 0.022 | 152.11 | -0.004 | 0.757 | -50.98 |
| Sleep quality | 0.016 | 0.008 | -131.23 | 0.023 | 0.002 | 262.90 |
| Sibling | 0.004 | 0.021 | -30.75 | -0.002 | 0.487 | -17.70 |
| Early-life health | -0.004 | 0.043 | 32.89 | -0.004 | 0.111 | -43.79 |
| Early-life hunger | -0.019 | 0.000 | 160.11 | -0.011 | 0.007 | -123.88 |
| Early-life economic | -0.006 | 0.003 | 53.06 | 0.002 | 0.349 | 21.05 |
| Early-life environment | -0.002 | 0.256 | 15.45 | -0.001 | 0.716 | -8.88 |
| Medical resource  accessibility | -0.001 | 0.391 | 6.14 | 0.001 | 0.448 | 16.39 |
| Medical insurance | 0.000 | 0.934 | 0.41 | -0.001 | 0.574 | -6.06 |
| Frequent IPT experience in early-life | 0.000 | 0.838 | -1.17 | 0.001 | 0.381 | 14.24 |
| Age | -0.014 | 0.284 | 115.36 | -0.001 | 0.891 | -10.05 |
| Gender | 0.005 | 0.005 | -44.15 | 0.016 | 0.001 | 185.52 |
| Education | -0.010 | 0.089 | 87.15 | 0.003 | 0.734 | 33.20 |
| Marriage | 0.000 | 0.797 | -3.28 | -0.002 | 0.293 | -24.32 |
| Region (reference group Eastern) |  |  |  |  |  |  |
| Northern | 0.002 | 0.203 | -15.53 | -0.001 | 0.477 | -12.27 |
| Northeastern | -0.001 | 0.321 | 10.23 | 0.001 | 0.662 | 6.97 |
| Northwestern | 0.002 | 0.206 | -18.01 | 0.009 | 0.015 | 105.36 |
| Southern | 0.000 | 0.529 | -2.68 | 0.000 | 0.960 | 0.58 |
| Southwestern | -0.010 | 0.001 | 84.79 | 0.007 | 0.109 | 74.78 |
| Central | 0.001 | 0.492 | -11.41 | 0.002 | 0.630 | 20.00 |
| Hukou (reference group agricultural) |  |  |  |  |  |  |
| Non-agricultural | 0.002 | 0.062 | -20.80 | 0.001 | 0.842 | 7.34 |
| Unified resident | -0.002 | 0.448 | 14.89 | -0.004 | 0.194 | -51.03 |
| None | 0.001 | 0.447 | -5.76 | -0.001 | 0.541 | -6.24 |
| Total | -0.057 | 0.001 | 483.19 | 0.036 | 0.156 | 405.61 |

**Appendix 2-2. Oaxaca-Blinder decomposition results for chronic disease**

|  | **Chronic disease** | | | | | |
| --- | --- | --- | --- | --- | --- | --- |
|  | **Compare group 1 (76-84 years old)** | | | **Compare group 2 (66-74 years old)** | | |
|  | Endowments | P-value | Contribution  (%) | Endowments | P-value | Contribution  (%) |
| Physical activity | 0.014 | 0.012 | 1.68 | 0.005 | 0.009 | 0.75 |
| Social activity | 0.000 | 0.851 | 0.01 | 0.000 | 0.673 | 0.04 |
| Internet | -0.001 | 0.847 | -0.12 | 0.016 | 0.002 | 2.23 |
| Sleep quality | 0.007 | 0.138 | 0.79 | -0.004 | 0.206 | -0.52 |
| Sibling | -0.001 | 0.724 | -0.18 | -0.004 | 0.042 | -0.59 |
| Early-life health | 0.000 | 0.927 | 0.03 | 0.000 | 0.688 | 0.03 |
| Early-life hunger | 0.004 | 0.241 | 0.50 | -0.003 | 0.528 | -0.46 |
| Early-life economic | -0.003 | 0.288 | -0.32 | -0.001 | 0.407 | -0.08 |
| Early-life environment | 0.002 | 0.344 | 0.23 | 0.000 | 0.670 | 0.04 |
| Medical resource  accessibility | 0.003 | 0.499 | 0.40 | -0.002 | 0.498 | -0.23 |
| Medical insurance | 0.000 | 0.797 | 0.05 | -0.001 | 0.238 | -0.18 |
| Frequent IPT experience in early-life | -0.001 | 0.664 | -0.09 | 0.000 | 0.880 | 0.00 |
| Age | -0.137 | 0.000 | -16.41 | -0.086 | 0.000 | -11.77 |
| Gender | 0.000 | 0.835 | -0.05 | 0.001 | 0.393 | 0.09 |
| Education | 0.011 | 0.056 | 1.29 | 0.000 | 0.914 | -0.02 |
| Marriage | 0.000 | 0.996 | 0.00 | 0.002 | 0.087 | 0.33 |
| Region (reference group Eastern) |  |  |  |  |  |  |
| Northern | 0.001 | 0.689 | 0.17 | -0.006 | 0.005 | -0.84 |
| Northeastern | -0.002 | 0.303 | -0.28 | 0.000 | 0.750 | 0.01 |
| Northwestern | -0.007 | 0.072 | -0.83 | 0.002 | 0.212 | 0.22 |
| Southern | 0.000 | 0.940 | 0.00 | 0.000 | 0.922 | -0.01 |
| Southwestern | 0.000 | 0.971 | 0.01 | 0.002 | 0.408 | 0.21 |
| Central | 0.000 | 0.862 | -0.01 | 0.000 | 0.660 | -0.06 |
| Hukou (reference group agricultural) |  |  |  |  |  |  |
| Non-agricultural | 0.004 | 0.495 | 0.48 | 0.009 | 0.002 | 1.28 |
| Unified resident | 0.006 | 0.336 | 0.68 | 0.000 | 0.872 | -0.06 |
| None | 0.000 | 0.697 | -0.03 | 0.000 | 0.865 | -0.01 |
| Total | -0.100 | 0.001 | -12.01 | -0.070 | 0.000 | -9.59 |
|  |  |  |  |  |  |  |
|  | **Compare group 3 (56-64 years old)** | | | **Compare group 4 (46-54 years old)** | | |
|  | Endowments | P-value | Contribution  (%) | Endowments | P-value | Contribution  (%) |
| Physical activity | 0.002 | 0.127 | 0.25 | -0.006 | 0.023 | -2.12 |
| Social activity | 0.000 | 0.796 | 0.03 | 0.000 | 0.922 | -0.04 |
| Internet | 0.039 | 0.000 | 6.04 | 0.020 | 0.145 | 6.75 |
| Sleep quality | -0.005 | 0.003 | -0.74 | -0.010 | 0.004 | -3.34 |
| Sibling | -0.005 | 0.003 | -0.73 | 0.003 | 0.255 | 0.88 |
| Early-life health | 0.000 | 0.615 | 0.07 | 0.004 | 0.066 | 1.33 |
| Early-life hunger | 0.021 | 0.000 | 3.29 | 0.006 | 0.027 | 2.21 |
| Early-life economic | 0.000 | 0.775 | -0.07 | -0.003 | 0.133 | -0.98 |
| Early-life environment | 0.001 | 0.563 | 0.08 | -0.002 | 0.270 | -0.54 |
| Medical resource  accessibility | 0.002 | 0.099 | 0.32 | 0.000 | 0.800 | -0.05 |
| Medical insurance | -0.001 | 0.332 | -0.10 | 0.000 | 0.641 | 0.10 |
| Frequent IPT experience in early-life | 0.000 | 0.766 | -0.01 | -0.002 | 0.231 | -0.54 |
| Age | -0.053 | 0.000 | -8.15 | -0.041 | 0.000 | -13.86 |
| Gender | 0.000 | 0.918 | -0.02 | 0.006 | 0.118 | 2.21 |
| Education | 0.008 | 0.212 | 1.16 | 0.001 | 0.934 | 0.23 |
| Marriage | 0.002 | 0.298 | 0.29 | 0.001 | 0.505 | 0.18 |
| Region (reference group Eastern) |  |  |  |  |  |  |
| Northern | -0.001 | 0.371 | -0.19 | 0.003 | 0.202 | 1.06 |
| Northeastern | 0.000 | 0.964 | 0.01 | 0.001 | 0.486 | 0.48 |
| Northwestern | -0.001 | 0.452 | -0.10 | -0.004 | 0.103 | -1.31 |
| Southern | 0.001 | 0.340 | 0.08 | 0.000 | 0.988 | 0.00 |
| Southwestern | 0.000 | 0.835 | 0.04 | -0.001 | 0.403 | -0.51 |
| Central | 0.000 | 0.664 | -0.07 | -0.002 | 0.267 | -0.69 |
| Hukou (reference group agricultural) |  |  |  |  |  |  |
| Non-agricultural | 0.002 | 0.152 | 0.25 | 0.008 | 0.029 | 2.58 |
| Unified resident | 0.001 | 0.734 | 0.12 | 0.002 | 0.469 | 0.77 |
| None | -0.001 | 0.547 | -0.09 | 0.001 | 0.444 | 0.20 |
| Total | 0.012 | 0.454 | 1.76 | -0.015 | 0.505 | -5.01 |

**Appendix 2-3. Oaxaca-Blinder decomposition results for disability**

|  | **Disability** | | | | | |
| --- | --- | --- | --- | --- | --- | --- |
|  | **Compare group 1 (76-84 years old)** | | | **Compare group 2 (66-74 years old)** | | |
|  | Endowments | P-value | Contribution  (%) | Endowments | P-value | Contribution  (%) |
| Physical activity | 0.001 | 0.446 | 0.99 | -0.001 | 0.119 | -2.00 |
| Social activity | 0.000 | 0.747 | -0.10 | 0.000 | 0.876 | -0.08 |
| Internet | 0.001 | 0.419 | 1.23 | 0.005 | 0.006 | 10.63 |
| Sleep quality | 0.002 | 0.129 | 2.14 | -0.001 | 0.197 | -2.50 |
| Sibling | -0.002 | 0.271 | -1.35 | -0.002 | 0.021 | -3.76 |
| Early-life health | 0.000 | 0.987 | -0.01 | 0.000 | 0.256 | -0.82 |
| Early-life hunger | 0.000 | 0.690 | -0.37 | 0.002 | 0.251 | 4.52 |
| Early-life economic | 0.001 | 0.433 | 0.45 | 0.000 | 0.340 | -0.63 |
| Early-life environment | 0.001 | 0.305 | 0.65 | 0.000 | 0.251 | 0.76 |
| Medical resource  accessibility | -0.005 | 0.010 | -4.64 | 0.003 | 0.004 | 6.10 |
| Medical insurance | 0.000 | 0.996 | 0.00 | 0.000 | 0.417 | 0.62 |
| Frequent IPT experience in early-life | 0.000 | 0.667 | 0.17 | 0.000 | 0.576 | -0.25 |
| Age | -0.011 | 0.171 | -9.16 | 0.007 | 0.144 | 16.49 |
| Gender | -0.001 | 0.287 | -0.79 | 0.000 | 0.446 | 0.42 |
| Education | 0.002 | 0.233 | 1.79 | 0.000 | 0.542 | 0.51 |
| Marriage | 0.000 | 0.879 | -0.02 | 0.000 | 0.285 | -0.90 |
| Region (reference group Eastern) |  |  |  |  |  |  |
| Northern | 0.000 | 0.722 | 0.25 | 0.000 | 0.870 | -0.20 |
| Northeastern | -0.001 | 0.381 | -0.51 | 0.000 | 0.668 | -0.12 |
| Northwestern | -0.002 | 0.075 | -1.90 | 0.000 | 0.427 | -0.43 |
| Southern | 0.000 | 0.717 | 0.21 | 0.000 | 0.929 | -0.06 |
| Southwestern | -0.004 | 0.034 | -3.20 | 0.000 | 0.564 | -0.81 |
| Central | 0.000 | 0.849 | 0.11 | 0.000 | 0.687 | -0.12 |
| Hukou (reference group agricultural) |  |  |  |  |  |  |
| Non-agricultural | 0.000 | 0.563 | 0.34 | -0.002 | 0.018 | -4.72 |
| Unified resident | 0.001 | 0.721 | 0.59 | 0.001 | 0.574 | 1.21 |
| None | 0.000 | 0.666 | 0.09 | 0.000 | 0.967 | -0.01 |
| Total | -0.015 | 0.096 | -13.03 | 0.010 | 0.076 | 23.86 |
|  |  |  |  |  |  |  |
|  | **Compare group 3 (56-64 years old)** | | | **Compare group 4 (46-54 years old)** | | |
|  | Endowments | P-value | Contribution  (%) | Endowments | P-value | Contribution  (%) |
| Physical activity | 0.000 | 0.117 | 1.45 | 0.000 | 0.605 | 2.64 |
| Social activity | 0.000 | 0.766 | -0.15 | -0.001 | 0.182 | -6.28 |
| Internet | 0.005 | 0.042 | 13.73 | 0.008 | 0.030 | 87.43 |
| Sleep quality | -0.001 | 0.012 | -3.00 | -0.002 | 0.016 | -20.17 |
| Sibling | 0.000 | 0.559 | -0.61 | 0.001 | 0.241 | 7.90 |
| Early-life health | 0.000 | 0.368 | 0.72 | 0.000 | 0.886 | 0.64 |
| Early-life hunger | 0.001 | 0.506 | 3.01 | 0.001 | 0.248 | 8.60 |
| Early-life economic | 0.002 | 0.001 | 5.41 | 0.000 | 0.824 | 0.98 |
| Early-life environment | 0.000 | 0.616 | 0.23 | 0.000 | 0.801 | 0.92 |
| Medical resource  Accessibility | 0.001 | 0.015 | 3.12 | 0.000 | 0.842 | 0.32 |
| Medical insurance | 0.000 | 0.905 | 0.07 | 0.000 | 0.987 | -0.02 |
| Frequent IPT experience in early-life | 0.000 | 0.520 | 0.39 | -0.001 | 0.188 | -5.58 |
| Age | 0.012 | 0.000 | 36.31 | 0.001 | 0.668 | 7.06 |
| Gender | 0.001 | 0.014 | 3.32 | 0.004 | 0.004 | 39.15 |
| Education | 0.003 | 0.143 | 7.82 | -0.007 | 0.003 | -72.29 |
| Marriage | 0.001 | 0.116 | 2.56 | 0.001 | 0.316 | 7.04 |
| Region (reference group Eastern) |  |  |  |  |  |  |
| Northern | 0.000 | 0.478 | -0.28 | 0.000 | 0.279 | 5.34 |
| Northeastern | 0.000 | 0.969 | 0.00 | 0.002 | 0.037 | 16.93 |
| Northwestern | 0.000 | 0.513 | -0.22 | -0.002 | 0.018 | -20.91 |
| Southern | 0.000 | 0.799 | -0.08 | 0.000 | 0.857 | 0.48 |
| Southwestern | 0.001 | 0.195 | 1.52 | -0.001 | 0.068 | -13.72 |
| Central | 0.000 | 0.658 | -0.31 | -0.001 | 0.272 | -5.99 |
| Hukou (reference group agricultural) |  |  |  |  |  |  |
| Non-agricultural | 0.000 | 0.489 | -0.64 | 0.003 | 0.011 | 27.10 |
| Unified resident | 0.000 | 0.454 | 1.46 | -0.001 | 0.089 | -16.18 |
| None | 0.000 | 0.720 | -0.28 | 0.000 | 0.823 | 0.43 |
| Total | 0.025 | 0.000 | 75.53 | 0.005 | 0.417 | 51.81 |

**Appendix 2-4. Oaxaca-Blinder decomposition results for ADL limitation**

|  | **ADL limitation** | | | | | |
| --- | --- | --- | --- | --- | --- | --- |
|  | **Compare group 3 (56-64 years old)** | | | **Compare group 4 (46-54 years old)** | | |
|  | Endowments | P-value | Contribution  (%) | Endowments | P-value | Contribution  (%) |
| Physical activity | 0.010 | 0.000 | 6.33 | 0.007 | 0.014 | 28.50 |
| Social activity | -0.001 | 0.510 | -0.36 | -0.002 | 0.306 | -6.99 |
| Internet | 0.022 | 0.008 | 14.07 | 0.003 | 0.814 | 12.48 |
| Sleep quality | -0.002 | 0.557 | -1.22 | -0.005 | 0.204 | -20.39 |
| Sibling | -0.005 | 0.006 | -3.12 | 0.000 | 0.975 | 0.20 |
| Early-life health | 0.002 | 0.101 | 1.47 | -0.002 | 0.272 | -8.75 |
| Early-life hunger | 0.013 | 0.018 | 7.83 | 0.004 | 0.161 | 17.16 |
| Early-life economic | 0.005 | 0.010 | 3.05 | -0.001 | 0.553 | -2.85 |
| Early-life environment | 0.000 | 0.834 | 0.08 | -0.002 | 0.170 | -8.73 |
| Medical resource  accessibility | 0.001 | 0.517 | 0.54 | 0.001 | 0.656 | 3.88 |
| Medical insurance | 0.001 | 0.160 | 0.83 | 0.000 | 0.801 | -0.37 |
| Frequent IPT experience in early-life | 0.000 | 0.800 | -0.03 | 0.000 | 0.603 | 1.55 |
| Age | 0.032 | 0.005 | 20.12 | 0.000 | 0.838 | 1.55 |
| Gender | -0.001 | 0.261 | -0.53 | -0.002 | 0.494 | -6.08 |
| Education | 0.028 | 0.000 | 17.42 | -0.007 | 0.178 | -26.26 |
| Marriage | 0.007 | 0.003 | 4.15 | 0.000 | 0.827 | -0.64 |
| Region (reference group Eastern) |  |  |  |  |  |  |
| Northern | 0.000 | 0.699 | -0.20 | 0.000 | 0.803 | 0.41 |
| Northeastern | 0.000 | 0.974 | 0.01 | -0.001 | 0.626 | -3.94 |
| Northwestern | -0.001 | 0.370 | -0.37 | -0.001 | 0.453 | -5.06 |
| Southern | 0.000 | 0.669 | 0.14 | 0.000 | 0.948 | 0.20 |
| Southwestern | 0.001 | 0.351 | 0.80 | -0.004 | 0.080 | -17.49 |
| Central | 0.000 | 0.767 | 0.15 | 0.000 | 0.734 | 0.76 |
| Hukou (reference group agricultural) |  |  |  |  |  |  |
| Non-agricultural | 0.000 | 0.637 | -0.22 | -0.001 | 0.526 | -5.05 |
| Unified resident | 0.002 | 0.389 | 1.31 | -0.003 | 0.366 | -11.42 |
| None |  |  |  | 0.000 | 0.645 | -0.88 |
| Total | 0.115 | 0.000 | 72.26 | -0.015 | 0.424 | -58.20 |

**Appendix 3. Balance test for PSM-DID**

| **Variable** | **Unmatched** | **Mean** | | **%Bias** | **%Reduct | bias |** | **t-test** | |
| --- | --- | --- | --- | --- | --- | --- | --- |
| **Matched** | **Treated** | **Control** | **t** | **p>|t|** |
| Age | U | 62.983 | 62.497 | 4.9 | 92.9 | 3.61 | 0.000 |
|  | M | 62.983 | 63.017 | -0.4 | -0.18 | 0.853 |
| Region |  |  |  |  |  |  |  |
| Northeastern | U | 0.102 | 0.133 | -9.7 | 90.2 | -6.65 | 0.000 |
| M | 0.102 | 0.105 | -1.0 | -0.54 | 0.586 |
| Northeastern | U | 0.053 | 0.042 | 5.6 | 84.8 | 4.18 | 0.000 |
| M | 0.053 | 0.052 | 0.8 | 0.44 | 0.661 |
| Southern | U | 0.101 | 0.085 | 5.6 | 97.0 | 4.15 | 0.000 |
| M | 0.101 | 0.101 | 0.2 | 0.09 | 0.930 |
| Southwestern | U | 0.275 | 0.222 | 12.3 | 98.2 | 9.00 | 0.000 |
| M | 0.275 | 0.274 | 0.2 | 0.12 | 0.906 |
| Central | U | 0.063 | 0.150 | -28.5 | 99.6 | -18.00 | 0.000 |
| M | 0.063 | 0.062 | 0.1 | 0.09 | 0.931 |
| Gender | U | 0.434 | 0.403 | 6.3 | 91.6 | 4.53 | 0.000 |
| M | 0.434 | 0.436 | -0.5 | -0.29 | 0.774 |
| Hukou |  |  |  |  |  |  |  |
| Non-agricultural | U | 0.168 | 0.015 | 18.7 | 92.7 | 14.45 | 0.000 |
| M | 0.168 | 0.040 | 1.4 | 0.68 | 0.498 |
| Unified Resident | U | 0.042 | 0.000 | 15.9 | 93.7 | 13.98 | 0.000 |
| M | 0.042 | 0.000 | 1.0 | 0.46 | 0.648 |
| None | U | 0.000 | 0.149 | 2.1 | 98.7 | 2.26 | 0.024 |
| M | 0.000 | 0.164 | 0.0 | 0.01 | 0.991 |
| Education |  |  |  |  |  |  |  |
| Middle school | U | 0.165 | 0.149 | 4.4 | 90.1 | 3.16 | 0.002 |
| M | 0.165 | 0.164 | 0.4 | 0.23 | 0.819 |
| High school and above | U | 0.077 | 0.059 | 7.2 | 96.0 | 5.42 | 0.000 |
| M | 0.077 | 0.076 | 0.3 | 0.15 | 0.884 |
| Marriage | U | 0.850 | 0.877 | -7.9 | 87.4 | -5.86 | 0.000 |
| M | 0.850 | 0.853 | -1.0 | -0.52 | 0.601 |

**Appendix 4. The parallel trend test for DID analysis**


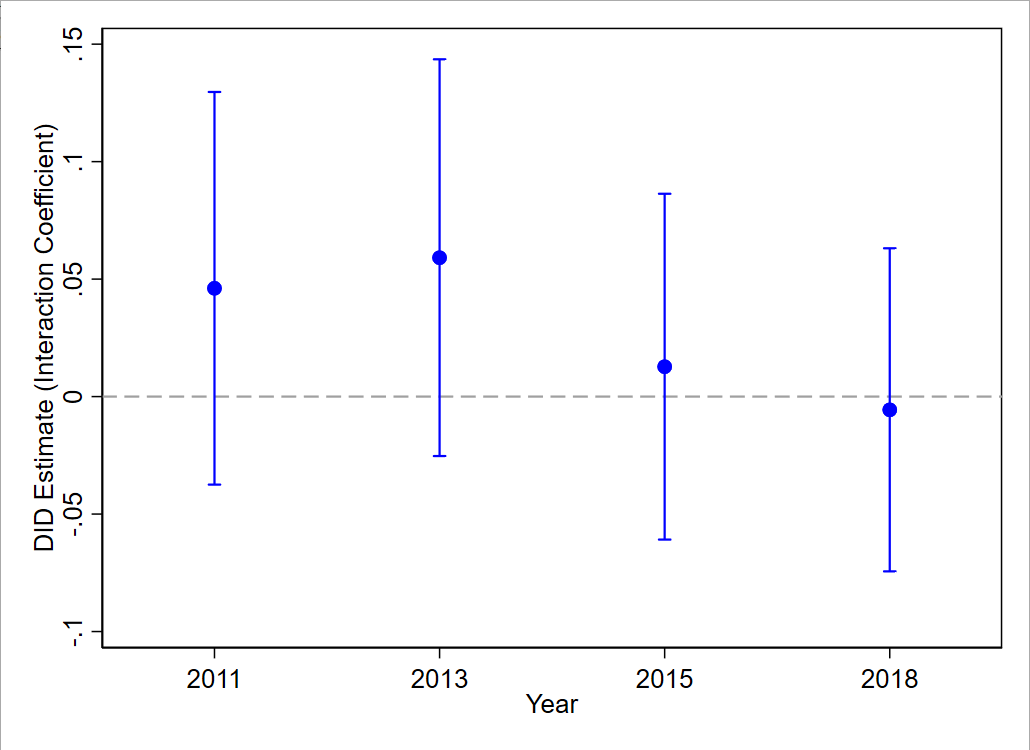


**Appendix 5. Results of inverse probability weighting (IPW) DID**

| **Variable** | **ADL limitation** |
| --- | --- |
| Treatment * After | -0.116***  (0.025) |
| Age | 0.024***  (0.001) |
| Region (reference group Eastern) |  |
| Northern | 0.215***  (0.041) |
| Northeastern | 0.120***  (0.046) |
| Southern | -0.010  (0.036) |
| Southwestern | 0.060**  (0.025) |
| Central | 0.085**  (0.038) |
| Gender | -0.069***  (0.022) |
| Hukou (reference group Agricultural) |  |
| Non-agricultural | 0.008  (0.039) |
| Unified resident | -0.132***  (0.037) |
| None | 0.078  (0.213) |
| Education (reference group primary school and below) |  |
| Middle school | -0.084***  (0.026) |
| High school and above | -0.166***  (0.036) |
| Marriage | -0.193***  (0.040) |
| _cons | -0.799***  (0.095) |
| Time fixed effect | YES |
| Individual fixed effect | YES |
| Observation | 89,409 |
| R-square | 0.060 |

Note: Standard error in parentheses, and *p < 0.1, **p < 0.05, ***p < 0.01.
